# Supplementary material for: Mass preparation of micro/nano-powders of biochar with water-dispersibility and their potential application
Source: Royal Society of Chemistry journal article supplement (doi:10.1039/c7nj00742f), 2017-01-01
Supplement: c7nj00742f1.pdf [file c7nj00742f1.pdf]

## Electronic Supplementary Information (ESI) for New Journal of Chemistry

### Mass preparation of micro/nano-powders of biochar with water-dispersibility and their potential application

Linjian Li,<sup>a,1</sup> Kun Zhang,<sup>b,1</sup> Li Chen,<sup>a</sup> Zhong Huang,<sup>a</sup> Guangbin Liu<sup>a,\*</sup> Mingfang Li,<sup>a</sup> and Yangping Wen<sup>a,\*</sup>

<sup>a</sup> Key Laboratory of Applied Chemistry, Jiangxi Agricultural University, Nanchang 330045, P.

R. China

<sup>b</sup> Jiangxi Institute of Red Soil, Nanchang, 330046, P. R. China

\*Corresponding author: E-mail: wenyangping1980@gmail.com, E-mail: lgb267@126.com

Fax: +86-791-83813538, Tel.: +86-791-83828158.

<sup>1</sup> These authors contributed equally to this work.

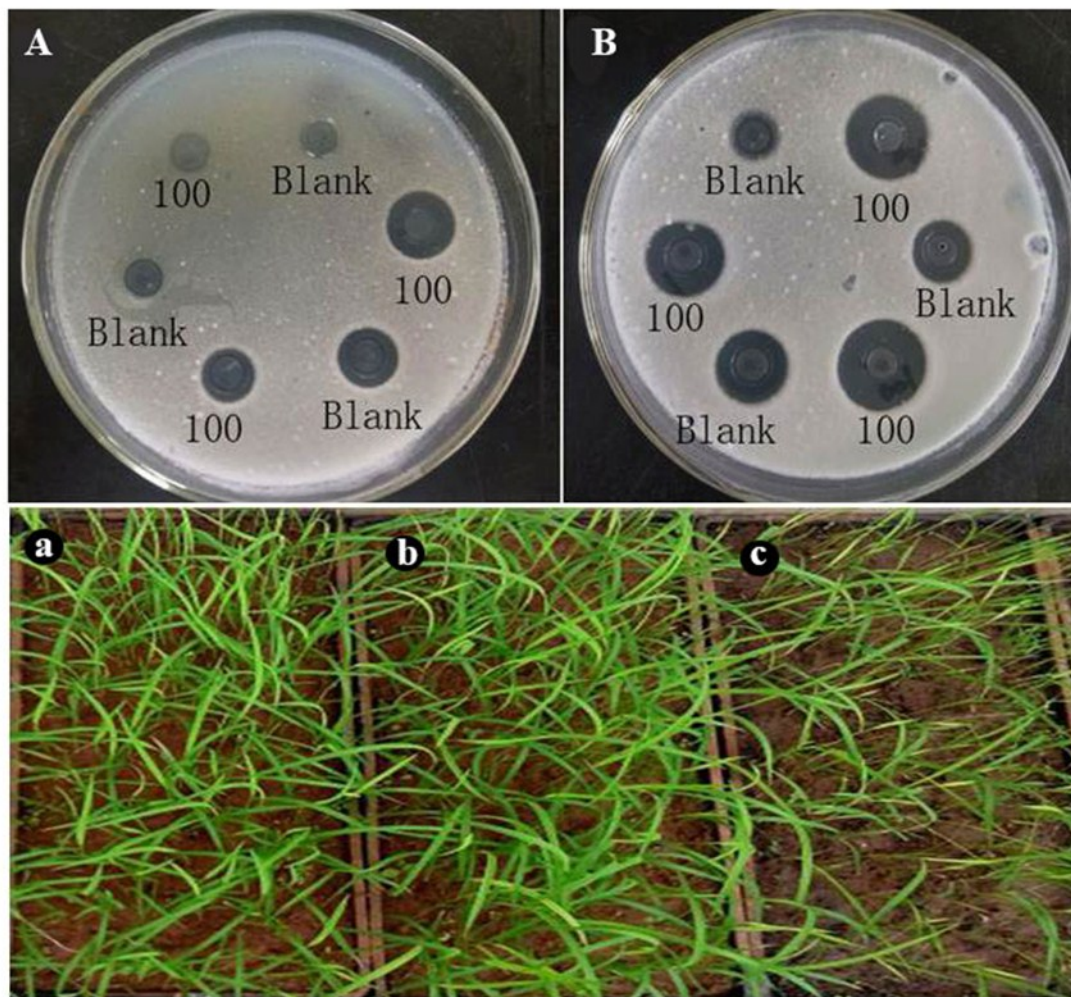

**Fig. S1** The antifungal effect by adding of  $100\mu\text{g}\cdot\text{mL}^{-1}$  micro/nano-biochars with water-dispersibility (A: the upper-layer biochar, B: the lower-layer biochar) and the effect of rice growth of rice nursery substrates containing (a: the upper-layer biochar, b: the lower-layer biochar, c: blank)

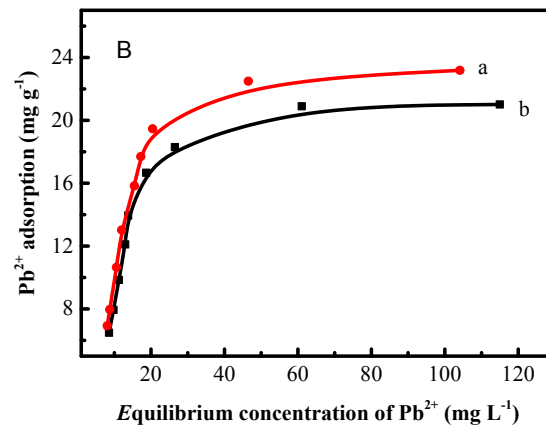

**Fig. S2** Langmuir isotherm plots for the adsorption of Pb<sup>2+</sup> onto the upper-layer (a) and the lower-layer (b) biochar with water-dispersibility and micro/nano-structure

**Table S1** A comparison of the analytical performance of modified electrodes based on different materials for the electrochemical determination of Pb<sup>2+</sup>.

| Materials                                | pH  | Buffer solution                         | Linear rang                   | LOD              | Referenc<br>e |
|------------------------------------------|-----|-----------------------------------------|-------------------------------|------------------|---------------|
| SnO <sub>2</sub> /reduced grapheme oxide | 5.0 | 0.1 M PBS                               | 0 - 1.3 μM                    | 18.39 nM         | 1             |
| MWCNT/SP                                 | 5.0 | 0.11 M ABS                              | 0 - 200 nM                    | 23 nM            | 2             |
| TiO <sub>2</sub> -ZrO <sub>2</sub> /PCE  | 3.0 | 0.1 M ABS                               | 0.01 - 10 mM                  | 7.6 μM           | 3             |
| BiF-EPPGE                                | 4.5 | 0.1 M ABS                               | 0.48 - 1.44 μM                | 0.4 nM           | 4             |
| Biochar/CPEM                             | 5.0 | 0.1 M PBS                               | 0.005 - 10 μM                 | 9.8 nM           | 5             |
| PBF/GCE                                  | 4.5 | 0.1 M ABS                               | 1.3 - 13 mM                   | 83 μM            | 6             |
| Carbon nanotube/nafion                   | 5.0 | 0.1M ABS                                | 0.08 - 6 μM                   | 5 nM             | 7             |
| Bismuth oxide SPE                        | 4.5 | 0.1 M ABS-HCl                           | 48 - 720 nM                   | 48 nM            | 8             |
| Bi-GECE                                  | 4.5 | 0.1M ABS                                | 97 - 770 nM                   | 112 nM           | 9             |
| Mercury film/SCPE                        | 4.5 | 0.1 M HCl + 0.5 M<br>NH <sub>4</sub> AC | 48.3 - 96.5 nM                | 4.83 nM          | 10            |
| BiBE                                     | 5.0 | 0.1 M ABS                               | 48.3 - 483 nM                 | 0.506 nM         | 11            |
| BINMSDE                                  | 4.5 | 0.1 M ABS                               | 9.65 - 57.9 nM                | 3.38 nM          | 12            |
| Biochars(nafion)/GCE                     | 5.0 | 0.1 M ABS                               | 0.02 – 8 μM<br>0.002 – 0.8 μM | 6.8 nM<br>0.7 nM | This work     |

## References

1. L.C.S. Figueiredo-Filho, B.C. Janegitz and O. Fatibelilo-Filho, *Anal. Methods*, 2013, **5**, 202.
2. R.T. Kachoosangi, C.E. Banks and X. Ji, *Anal. Sci.*, 2007, **23**, 283.
3. R.O. Kadara, N. Jenkinson and C.E. Banks, *Electroanal.*, 2009, **21**, 2410.
4. Ü.A. Kirgöz, S. Marín, and M. Pumera, *Electroanal.*, 2005, **17**, 881.
5. H. Li, J. Li and Z. Yang, *J. hazard. Mater.*, 2011, **191**, 26-31.
6. P.K.Q. Nguyen and S.K. Lunsford, *Talanta*, 2012, **101**, 110.
7. M.F.M. Noh and I. E. Tohill, *Sains. Malays*, 2011, **40**, 1153.

- 8 S.R. Prabakar, C. Sakthivel and S.S. Narayanan, *Talanta*, 2011, **85**, 290.
9. W. Song, L. Zhang and L. Shi, *Microchim. Acta*, 2010, **169**, 321.
- 10 T.M. Sugihiro, P.R. de Oliveira and E.I.P. de Rezende, *Bioresour. Technol.*, 2010, **143**, 40.
11. D. Sun and Z. Sun, *J. Appl. Electrochem.*, 2008, **38**, 1223.
12. Y. Wei, C. Gao, F.L. Meng, H.H. Li, L. Wang, J.H. Liu and X.J. Huang, *J. Phys. Chem. C.*, 2011, **16**, 1034-1041

| Additive            | Concentration ( $\mu\text{g}\cdot\text{mL}^{-1}$ ) <sup>1)</sup> | Inhibition zone diameter (mm) |
|---------------------|------------------------------------------------------------------|-------------------------------|
| Blank               | 0                                                                | $8.99 \pm 0.70^b$             |
| Upper-layer biochar | 50                                                               | $9.13 \pm 0.53^b$             |
|                     | 100                                                              | $11.30 \pm 0.90^a$            |
|                     | 250                                                              | $9.945 \pm 0.74^a$            |
| Lower-layer biochar | 50                                                               | $8.85 \pm 0.20^b$             |
|                     | 100                                                              | $13.46 \pm 0.31^a$            |
|                     | 250                                                              | $12.21 \pm 1.92^c$            |

**Table S2** The antifungal effect by adding of as-obtained two biochars.

\*Note: Multiple comparisons were done by Duncans new multiple range method test, and <sup>a</sup>, <sup>b</sup>, <sup>c</sup> mean values in the same line with different superscripts differ significantly 0.05 ( $p < 0.05$ ).

**Table S3** Langmuir constants for adsorption of  $\text{Pb}^{2+}$  on two biochars.

|                     | $K_L$  | $q_m$ | $R^2$ |
|---------------------|--------|-------|-------|
| Upper-layer biochar | 0.0202 | 56.56 | 0.857 |
| Lower-layer biochar | 0.0260 | 41.67 | 0.834 |
